# Supplementary material for: Compound developmental eye disorders following inactivation of TGFβ signaling in neural-crest stem cells
Source: PubMed Central journal article supplement (PMC1414066; doi:10.1186/jbiol29), 2005-12-14
Supplement: jbiol29-S1.pdf [file jbiol29-S1.pdf]

## Additional data file I

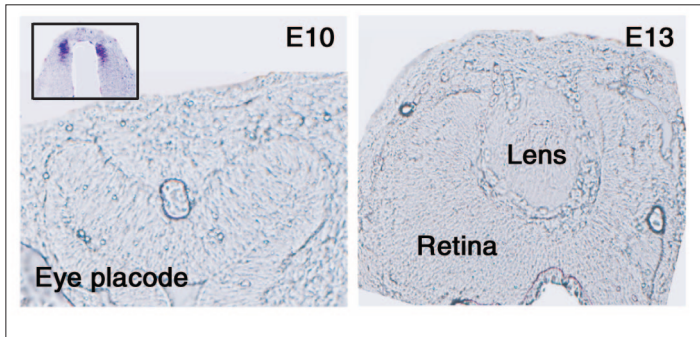

### Additional figure I

Absence of *Wnt1* expression during eye formation. *Wnt1* *in situ* hybridization analyses at E10 (left panel) and E13 (right panel) revealed that *Wnt1* expression is readily detectable in the dorsal neural tube (purple; insert), leading to *Wnt1*-Cre-mediated recombination in virtually all neural crest stem cells [11]. On the same sections *Wnt1* is not, however, expressed in ocular structures during development.

---
